# Supplementary material
Source: PubMed Central journal article supplement (PMC5444171)
Supplement: AAC.02402-16_zac006176233s1.pdf [file AAC.02402-16_zac006176233s1.pdf]

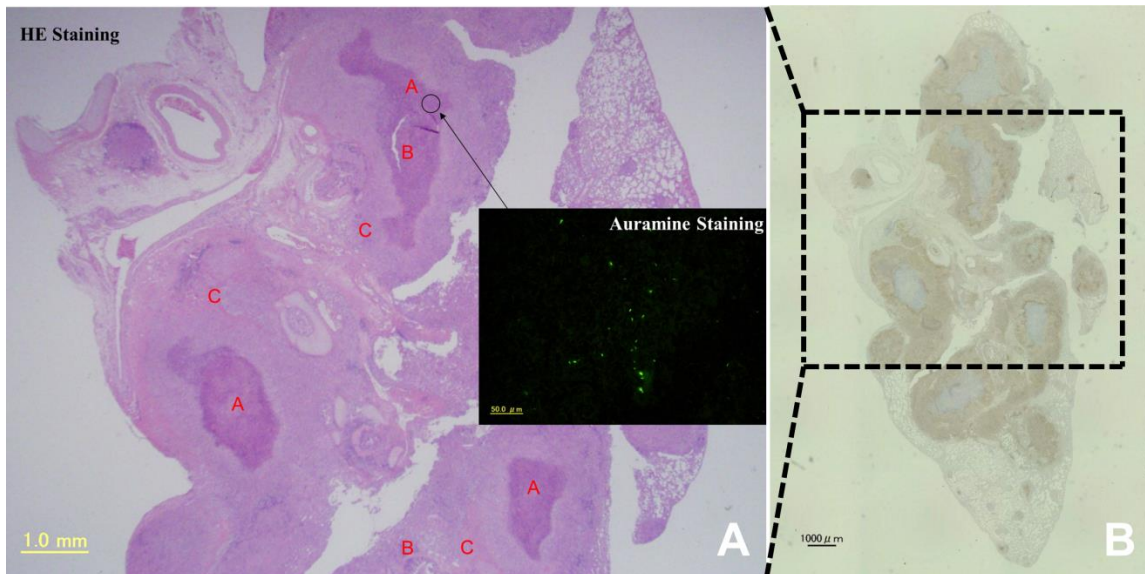

1  
2 **Supplemental data 1. Morphological examination of lungs from a guinea pig**  
3 **infected with MTB.**  
4 The morphology of the lung lesions in a lung tissue section from a guinea pig after  
5 infection with MTB Kurono strain for 4 weeks. (A) Guinea pig lungs were stained by  
6 H&E and auramine staining (the fluorescence image). Area A: A single granuloma  
7 showing a central necrotic lesion, Area B: Central calcification was found in a single  
8 granuloma, Area C: showing an increased number of epithelioid cells. The position of  
9 auramine staining is indicated by a circle with an arrow. TB bacilli are indicated by the  
10 green fluorescence. (B) A whole lung section stained by immunohistochemistry for  
11 pimonidazole, an agent used to identify hypoxic regions (14). Pimonidazole positive  
12 staining (brownish color) can be seen in granulomas in regions surrounding the central  
13 necrosis lesions, as necrotic areas themselves cannot be stained due to the lack of live  
14 cells. The corresponding area of H&E staining, as shown in Figure 3B, is indicated by the  
15 dashed line rectangle.

16

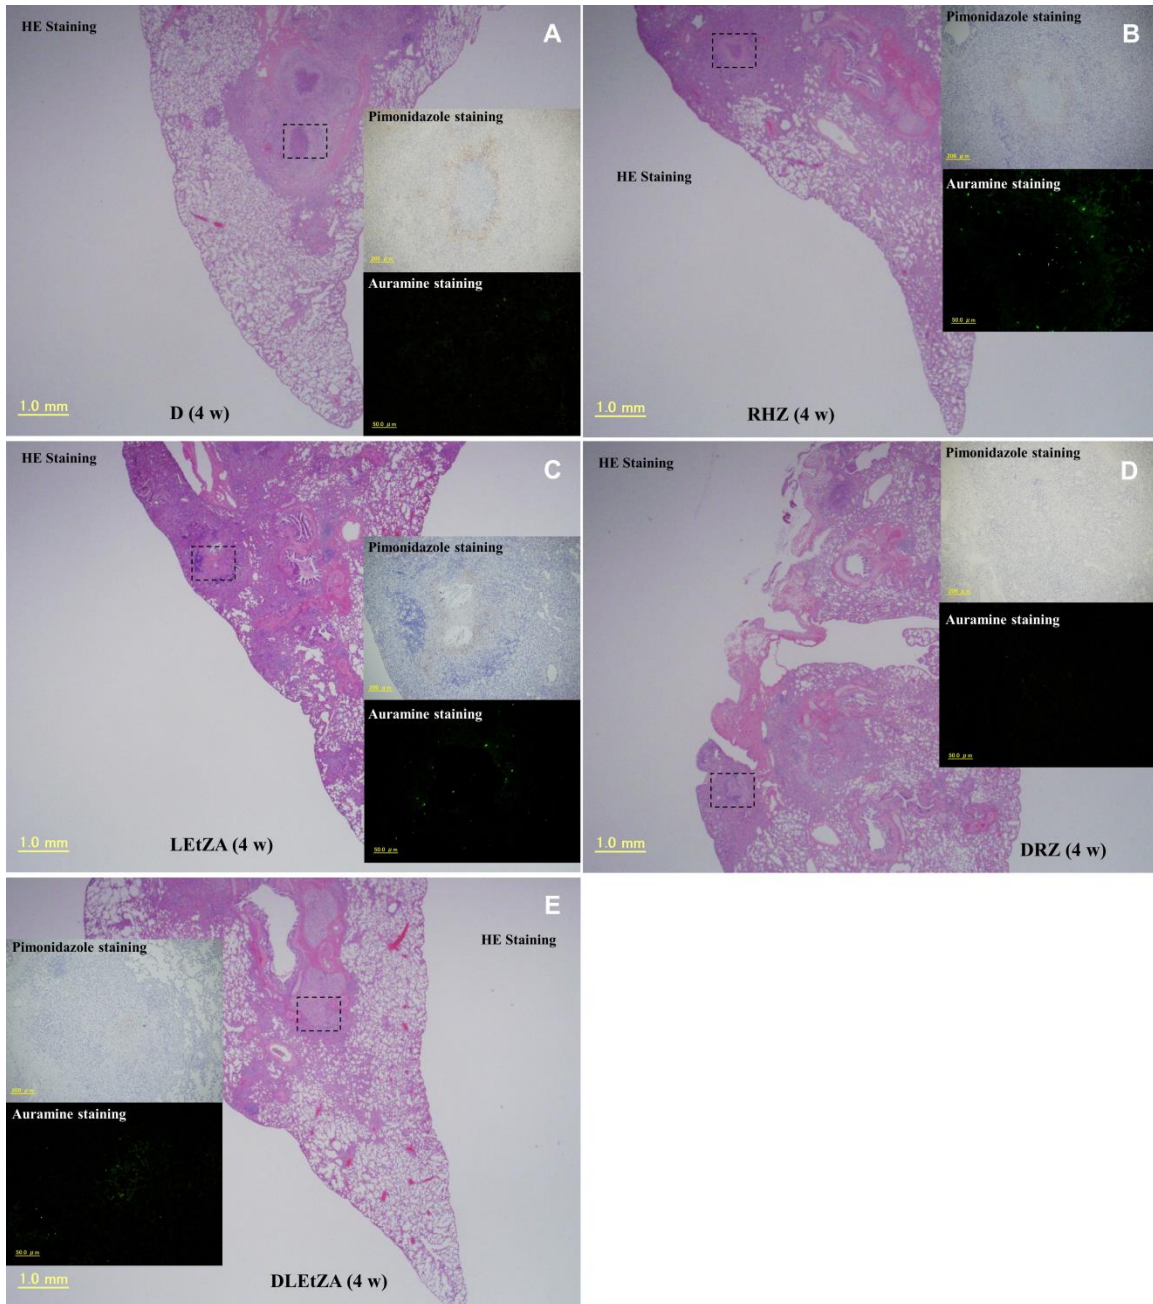

17  
 18 **Supplemental data 2. Comparison of histological changes of lung lesions after**  
 19 **treatment.**  
 20 Representative lung sections after 4 weeks of treatments with (A) D, (B) RHZ, (C)  
 21 LEtZA, (D) DRZ, and (E) DLEtZA. Animals in each group were sacrificed and lungs  
 22 were stained by H&E, auramine (to stain TB bacilli, showing as green fluorescence), and  
 23 pimonidazole (to stain hypoxic lesions as brownish color) staining. The position of

24 auramine staining is indicated by a rectangle with a dotted line. MTB bacilli were  
25 observed in the lungs treated with standard first-line treatment RHZ (B) and MDR-TB  
26 regimen LEtZA (C). Importantly, the hypoxic lesions were clearly absent in lungs treated  
27 with DRZ (D replaced H in the first-line regimen) (D) or DLEtZA (D with a MDR-TB  
28 regimen) (E). (D: DLM, 100 mg/kg; R: RIF, 25mg/kg; H: INH, 25mg/kg; Z: PZA,  
29 150mg/kg; L: LVX, 50mg/kg; Et: ETO, 50 mg/kg; A: AMK, 150 mg/kg)

30

31

32

33

34

35

36

37

38

39

40

41

42

43

44

45

46

47

| DLM in guinea pigs | Dose (mg/kg) | Concentration ( $\mu\text{g/mL}$ or g) |                    |                    |                    |                      |                    |                    | $C_{\text{max}}$ ( $\mu\text{g/mL}$ or g) | $\text{AUC}_t$ ( $\mu\text{g}\cdot\text{h/mL}$ or g) | $t_{\text{max}}$ (h) | $t_{1/2}$ (h) |
|--------------------|--------------|----------------------------------------|--------------------|--------------------|--------------------|----------------------|--------------------|--------------------|-------------------------------------------|------------------------------------------------------|----------------------|---------------|
|                    |              | 1h                                     | 2h                 | 4h                 | 8h                 | 16h                  | 24h                | 48h                |                                           |                                                      |                      |               |
| Plasma             | 100          | 0.05<br>$\pm 0.02$                     | 0.12<br>$\pm 0.05$ | 0.20<br>$\pm 0.10$ | 0.53<br>$\pm 0.14$ | 0.51<br>$\pm 0.42$   | 0.08<br>$\pm 0.02$ | 0.01<br>$\pm 0.01$ | 0.53                                      | 9.45                                                 | 8                    | 6.07          |
| Lung               | 100          | 1.17<br>$\pm 0.51$                     | 2.05<br>$\pm 0.84$ | 3.66<br>$\pm 2.70$ | 5.86<br>$\pm 2.54$ | 10.83<br>$\pm 11.68$ | 2.12<br>$\pm 0.84$ | 0.28<br>$\pm 0.14$ | 10.83                                     | 174.25                                               | 16                   | 6.48          |

48 **A**

49

| Lung wt (g) of each group (4 wk) | Control    | D          | RHZ        | DRZ        | LEtZA      | DLEtZA     |
|----------------------------------|------------|------------|------------|------------|------------|------------|
| means                            | 10.38      | 3.02       | 3.02       | 2.49       | 2.44       | 2.75       |
| SD                               | $\pm 2.67$ | $\pm 0.20$ | $\pm 0.31$ | $\pm 0.35$ | $\pm 0.09$ | $\pm 0.23$ |

  

| Lung wt (g) of each group (8 wk) | Control*   | D          | RHZ        | DRZ        | LEtZA      | DLEtZA     |
|----------------------------------|------------|------------|------------|------------|------------|------------|
| means                            | 8.77       | 3.18       | 2.46       | 2.58       | 2.48       | 2.49       |
| SD                               | $\pm 3.95$ | $\pm 0.22$ | $\pm 0.06$ | $\pm 0.19$ | $\pm 0.20$ | $\pm 0.30$ |

50 \*: n=2

51 **B**52 **Supplemental data 3. Carryover of DLM at 100 mg/kg in guinea pig lungs. (A)**

53 Plasma and lung concentrations of DLM after oral administration at a dose of 100 mg/kg  
54 in guinea pigs. Based on the mean concentration of DLM in the lungs at 48 h (0.28  $\mu\text{g/g}$ )  
55 and the half-life parameter (6.48 h), the concentration of DLM in the lungs after 74 h at a  
56 dose of 100 mg/kg was calculated to be about 0.018  $\mu\text{g/g}$ . Each value represents the mean  
57  $\pm$  SD (n = 3). The pharmacokinetic parameters were calculated using WinNonlin  
58 software (version 6.1). (B) The mean lung weights of the animals in each regimen group  
59 (D: DLM; R: RIF; H: INH; Z: PZA; L: LVX; Et: ETO; A: AMK). The mean weight of  
60 lungs in the treated groups did not exceed 3.18 g. Each value represents the mean  $\pm$  SD (n  
61 = 3, except for Control 8w, as described above). After adding 5 mL of sterile distilled  
62 water, the concentration of DLM in lung homogenates at the time of plating was  
63 calculated to be about 0.007  $\mu\text{g/mL}$ , which is lower than the MIC of DLM against MTB  
64 Kurono (0.012  $\mu\text{g/mL}$ ).

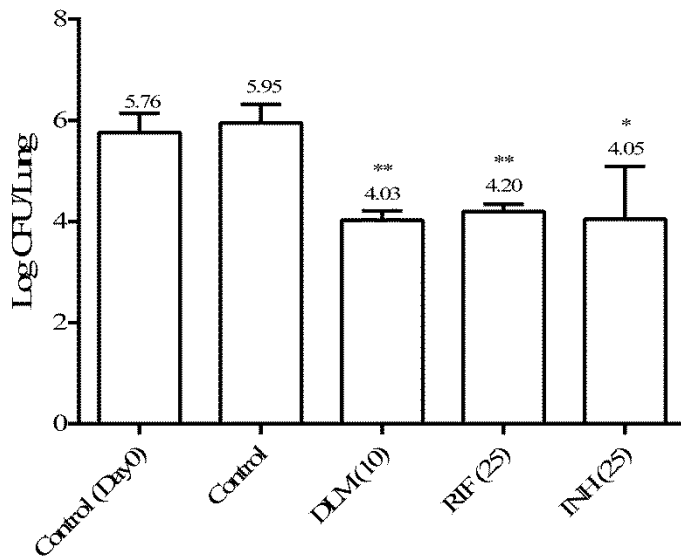

65

66 **Supplemental data 4. Lung CFU of MTB infected guinea pigs treated with DLM,**  
 67 **RIF, and INH for 4 weeks.**

68 Guinea pigs were infected with MTB Kurono by an intratracheal inoculation. After 4  
 69 weeks post-infection, chemotherapy was initiated and the dosing frequency was 5 days  
 70 per week by oral gavage. Viable bacterial numbers in whole lungs were counted after the  
 71 treatment with DLM (10mg/kg), RIF (25mg/kg), or INH (25 mg/kg) for 4 weeks (three  
 72 animals per group). Each value represented the mean of triplicate samples ± SD of three  
 73 replicates. \*\*:  $P < 0.01$ . \*:  $P < 0.05$  vs. Control.

74

75

76

77

78

79

80

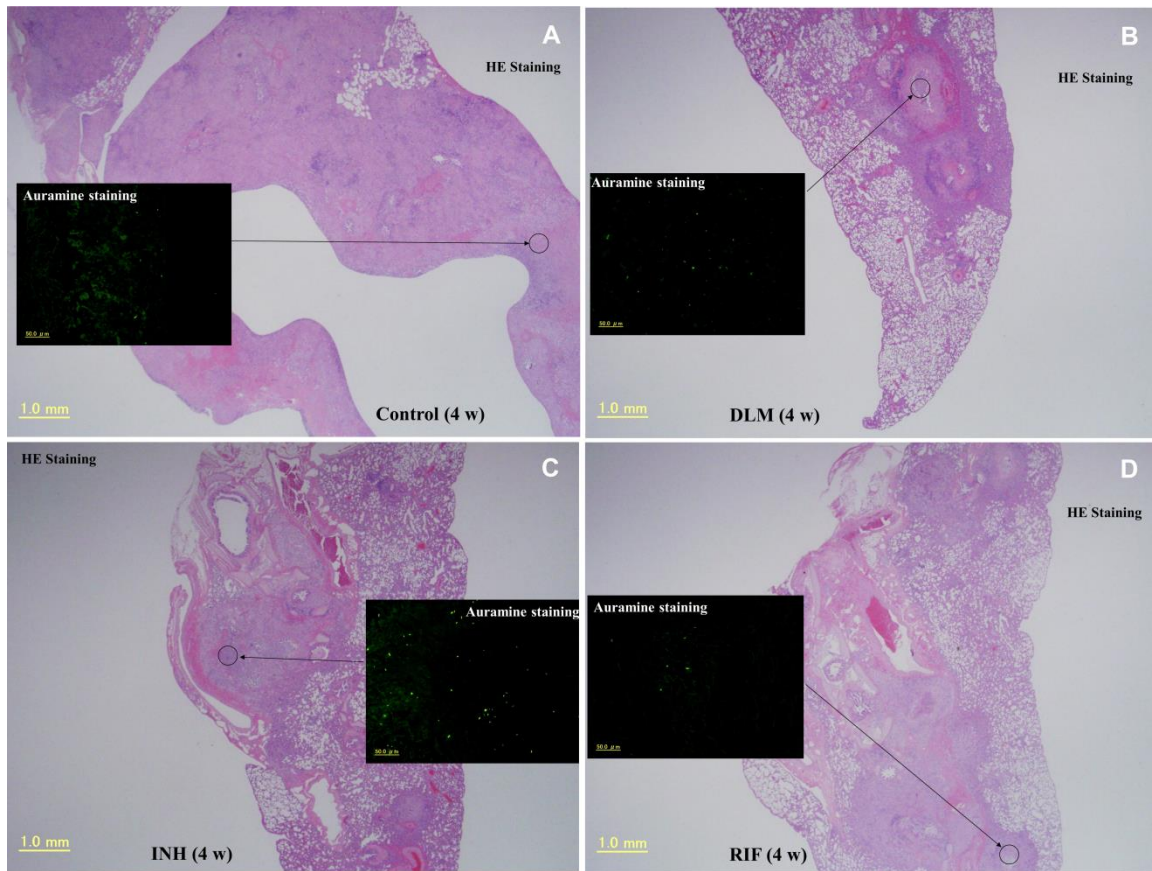

81

82 **Supplemental data 5. Histological analysis of lung lesions from guinea pigs treated**  
 83 **with DLM, RIF, and INH for 4 weeks.**

84 After 4 weeks of treatments with (A) Control, (B) DLM (10 mg/kg), (C) INH (25 mg/kg),  
 85 and (D) RIF (25 mg/kg), the animals in each group were sacrificed and lungs were  
 86 stained by H&E and auramine (to stain TB bacilli) staining. The position of auramine  
 87 staining is indicated by a circle pointed to by an arrow within a granuloma. Note that  
 88 DLM at this lowered dose and RIF moderately reduced the number of TB bacilli within a  
 89 granuloma, while INH had no apparent effect.
